# Supplementary material for: Preclinical PET imaging of bispecific antibody ERY974 targeting CD3 and glypican 3 reveals that tumor uptake correlates to T cell infiltrate
Source: PubMed Central journal article supplement — J Immunother Cancer. 2020 Mar 26;8(1):e000548. doi: 10.1136/jitc-2020-000548 (PMC7206965; doi:10.1136/jitc-2020-000548), 2020-03-26
Supplement: jitc-2020-000548supp001.pdf [file jitc-2020-000548supp001.pdf]

**Additional file 1****Additional Methods.****Conjugation, radiolabeling and quality control**

ERY974, KLH/CD3, KLH/KLH and IgG4 were conjugated with tetrafluorophenol-N-succinyl desferal-Fe (N-suc-Df; ABX) as described before (1, 2). In short, antibodies were purified using Vivaspin-2 30,000 MWCO PES centrifugal concentrators (Sartorius) in 0.9% NaCl (Braun). After pH adjustment to 9.0 using 0.1 M Na<sub>2</sub>CO<sub>3</sub>, a 4-fold excess of N-suc-Df was added for 30 minutes. Subsequently Fe<sup>3+</sup> was removed using EDTA and the solution was purified using PD-10 column (GE Healthcare) and 0.9% NaCl as eluent. Quality of conjugated antibody was assessed using size exclusion high-performance liquid chromatography as described before (1), using a TSKgel G3000SW<sub>XL</sub> column (Tosoh). Radiolabeling of antibodies with [<sup>89</sup>Zr]Zr-oxalate (PerkinElmer) was performed as described before (2). After 1 hour incubation, radiochemical purity was above 95% for all experiments and purification was not performed. Molar activity for all experiments was 72.8 MBq/nmol, unless stated otherwise.

Binding to GPC3 and CD3ε was tested using an ELISA based method. Recombinant human GPC3 (10088-H08H; Sino Biologicals Inc.) or CD3ε (10977-H08H; Sino Biologicals Inc.) were diluted in 0.05M Na<sub>2</sub>CO<sub>3</sub> to a concentration of 0.1 µg/mL. Nunc-Immuno 96 well MicroWell MaxiSorp plates (Thermo Fisher Scientific) were coated with 100 µL recombinant protein at 4°C overnight. Wells were washed with 0.05% Tween20 in phosphate buffered saline (PBS; 140 mM/L NaCl, 9 mM/L Na<sub>2</sub>HPO<sub>4</sub>, 1.3 mM/L NaH<sub>2</sub>PO<sub>4</sub>, pH 7.4, UMCg). Next, wells were blocked with 0.5% bovine serum albumin (BSA), 0.05% Tween20 in PBS for 2 hours at

room temperature (RT). After blocking, wells were incubated with a concentration series (0.02 nM – 137.4 nM) of mAb diluted in 0.5% BSA/0.05% Tween20/PBS for 1 hour at RT. Subsequently, wells were washed three times with 0.05% Tween20/PBS followed by 1 hour incubation at RT of rabbit anti-human IgA, IgG, IgM, Kappa, Lambda HRP (1:8000; Agilent DAKO). Again, wells were washed three times with 0.05% Tween20/PBS followed by addition of 100  $\mu$ L substrate SureBlue Reserve TMB microwell substrate (KPL Inc.). Reaction was stopped with 1 M hydrochloric acid (UMCG) and absorbance at 450 nm was determined with a microplate reader (Bio-Rad).

T cell activation potency was determined using a co-culture of HepG2 cells with Jurkat cells that express a luciferase reporter driven by a Nuclear Factor of Activated T cells response element (Jurkat-NFAT; Promega). In a 96-well plate, 12,500 HepG2 cells and 75,000 Jurkat-NFAT effector cells were incubated overnight at 37°C with a concentration of ERY974 or N-suc-Df-ERY974 ranging from 0.05 pM to 137.4 nM. After incubation, 75  $\mu$ L Bio-Glo reagent (Promega) was added and bioluminescence was determined with a Synergy plate reader (Biotek).

#### **Internalization of [ $^{89}\text{Zr}$ ]Zr-N-suc-Df-ERY974**

To determine internalization of [ $^{89}\text{Zr}$ ]Zr-N-suc-Df-ERY974,  $10^6$  HepG2 cells were incubated with 50 ng [ $^{89}\text{Zr}$ ]Zr-N-suc-Df-ERY974 in 1 mL medium on ice for 1 hour. After initial binding, unbound [ $^{89}\text{Zr}$ ]Zr-N-suc-Df-ERY974 was washed three times using 1% human serum albumin in PBS. Next, cells were incubated at 4°C or 37°C for 1, 2, or 4 hours. After incubation, cell membranes were stripped with 1 mL stripping buffer (0.05 M glycine, 0.1 M NaCl, pH 2.8) at 4°C. Radioactivity of the cell pellet (internalization) was expressed as percentage of radioactivity initially bound to cells.

## Immunohistochemistry

Formalin-fixed paraffin-embedded 4 µm tissue slides were stained with immunohistochemistry using 2 µg/mL rabbit monoclonal GPC3 antibody (SP86; Abcam) or isotype control (EPR25A; Abcam), followed by rabbit EnVision HRP (Agilent). Human placenta and HepG2 tumor of [<sup>89</sup>Zr]Zr-N-suc-Df-ERY974 injected huNOG mice were used as positive control tissue (Additional file 1 Fig. S10A). For CD3, tissues were stained using 0.15 µg rabbit monoclonal CD3 antibody (SP162; Abcam) or isotype control (EPR25A; Abcam), followed by rabbit EnVision HRP (Agilent). Human liver and HepG2 tumors of [<sup>89</sup>Zr]Zr-N-suc-Df-ERY974 injected mice were used as positive control tissue (Additional file 1 Fig. S10B). CD3+ cells were quantified using positive cell detection using QuPath (3).

## Flow cytometry

HepG2, TOV-21G and SK-HEP-1 cells were harvested and suspended in 20 µg/mL of ERY974 or human IgG4 in 0.5% fetal bovine serum (FBS)/2 mM EDTA/PBS. Cells were incubated for 1 hour at 4°C, subsequently washed twice with 0.5% FBS/2 mM EDTA/PBS and incubated with PE-labeled goat anti-human IgG (1:50; Thermo Fisher Scientific) at for 1 hour 4°C. After two more washes with 0.5% FBS/2 mM EDTA/PBS, cells were measured using a BD Accuri C6 flow cytometer (BD Biosciences).

## Additional Figure legends S1-S10

**Fig. S1. Human CD3+ engraftment in huNOG mice.** Percentage of human CD3+ of human CD45+ cells in the experimental groups involving huNOG mice.

65 **Fig. S2. *In vitro* characteristics of N-suc-Df-conjugated tracers.** (A) Representative binding  
66 curve of N-suc-Df-ERY974 and ERY974 binding to human GPC3 protein. (B) Representative  
67 binding curve of N-suc-Df-ERY974 and ERY974 binding to human CD3 $\epsilon$  protein. (C) Potency  
68 of ERY974 and N-suc-Df-ERY974 to activate reporter T cells upon co-culture with HepG2 cells.  
69 (D) Internalization up to 4 h of [ $^{89}\text{Zr}$ ]Zr-N-suc-Df-ERY974 in HepG2 cells at 4 and 37 °C ( $n$  =  
70 3). (E) Representative binding curve of N-suc-Df-KLH/CD3 and N-suc-Df-KLH/KLH to human  
71 GPC3 protein. (F) Representative binding curve of N-suc-Df-KLH/CD3 and N-suc-Df-  
72 KLH/KLH to human CD3 $\epsilon$  protein.

73  
74 **Fig. S3. Tumor characteristics of HepG2, TOV-21G and SK-HEP-1.** (A) Hematoxylin and  
75 eosin (H&E), autoradiography and glypican-3 (GPC3) staining of HepG2, TOV-21G and SK-  
76 HEP-1 xenografts. Scale bar length represents 5 mm for HepG2, 1 mm for TOV-21G and 2.5  
77 mm for SK-HEP-1, and 250  $\mu\text{m}$  for the zoomed slides. Autoradiography and H&E were  
78 performed on the same slide. For each cell line, flow cytometry was performed using ERY974 as  
79 primary antibody (black), including IgG4 as control (red; right panel). (B) SDS-PAGE  
80 autoradiography of different individual HepG2 (left), TOV-21G (middle) and SK-HEP-1 (right)  
81 lysates and corresponding plasma samples. + represents activity matched [ $^{89}\text{Zr}$ ]Zr-N-suc-Df-  
82 ERY974 tracer from injected solution. kDa = kilodalton.

83  
84 **Fig. S4. Influence of Fc $\gamma$ R binding and radioactive dose on biodistribution of different**  
85 **tracers in mice.** (A) Spleen uptake at 168 h after administration of 10  $\mu\text{g}$  of [ $^{89}\text{Zr}$ ]Zr-N-suc-Df-  
86 ERY974 ( $n$  = 6), [ $^{89}\text{Zr}$ ]Zr-N-suc-Df-KLH/CD3 ( $n$  = 5), [ $^{89}\text{Zr}$ ]Zr-N-suc-Df-KLH/KLH ( $n$  = 6)  
87 and [ $^{89}\text{Zr}$ ]Zr-N-suc-Df-IgG4 ( $n$  = 5) expressed as median % injected dose per gram (%ID/g) with

interquartile range. **(B)** Spleen weight of [ $^{89}\text{Zr}$ ]Zr-N-suc-Df-ERY974 ( $n = 6$ ), [ $^{89}\text{Zr}$ ]Zr-N-suc-Df-KLH/CD3 ( $n = 5$ ), [ $^{89}\text{Zr}$ ]Zr-N-suc-Df-KLH/KLH ( $n = 6$ ) and [ $^{89}\text{Zr}$ ]Zr-N-suc-Df-IgG4 ( $n = 5$ ) expressed as median weight in mg with interquartile range. **(C)** Spleen weight of NOG mice injected with 10  $\mu\text{g}$  of [ $^{89}\text{Zr}$ ]Zr-N-suc-Df-ERY974 labeled with 5 MBq ( $A_m$ : 14.6 MBq/nmol) at 72 h ( $n = 2$ ), 120 h ( $n = 2$ ) and 168 h ( $n = 12$ ) after administration expressed as median weight with interquartile range (IQR).  $A_m$  = molar activity. **(D)** Spleen uptake of NOG mice injected with 10  $\mu\text{g}$  of [ $^{89}\text{Zr}$ ]Zr-N-suc-Df-ERY974 labeled with 1 MBq ( $A_m$ : 14.6 MBq/nmol;  $n = 6$ ) or 5 MBq ( $A_m$ : 72.8 MBq/nmol;  $n = 12$ ) at 168 h expressed as median % injected dose per gram with IQR. **(E)** Spleen weight of NOG mice injected with 10  $\mu\text{g}$  of [ $^{89}\text{Zr}$ ]Zr-N-suc-Df-ERY974 labeled with 1 MBq ( $A_m$ : 14.6 MBq/nmol;  $n = 6$ ) or 5 MBq ( $A_m$ : 72.8 MBq/nmol;  $n = 12$ ) at 168 h expressed as median weight with IQR. **(F)** Radioactivity dose of the spleen of NOG mice injected with 10  $\mu\text{g}$  of [ $^{89}\text{Zr}$ ]Zr-N-suc-Df-ERY974 labeled with 1 MBq ( $A_m$ : 14.6 MBq/nmol  $n = 6$ ) or 5 MBq ( $A_m$ : 72.8 MBq/nmol;  $n = 12$ ) at 168 h expressed as median dose with IQR. **(G)** Hematoxylin and eosin (H&E; 400x) staining of a NOG mice spleen injected with 1 MBq ( $A_m$ : 14.6 MBq/nmol) or 5 MBq ( $A_m$ : 72.8 MBq/nmol) of [ $^{89}\text{Zr}$ ]Zr-N-suc-Df-ERY974 at 168 h after tracer administration. Scale bar length represents 250  $\mu\text{m}$ . **(H)** Uptake of [ $^{89}\text{Zr}$ ]Zr-N-suc-Df-ERY974 in spleen, bone, liver and blood in NOG ( $n = 6$ ) and BALB/c<sup>nu</sup> ( $n = 6$ ) at 168 h after tracer administration expressed as median % injected dose per gram of tissue (%ID/g) with interquartile range (IQR). **(I)** Uptake of [ $^{89}\text{Zr}$ ]Zr-N-suc-Df-ERY974 in spleen in NOG ( $n = 6$ ) and BALB/c<sup>nu</sup> ( $n = 6$ ) at 168 h after tracer administration expressed as median % ID/g with IQR. **(J)** Spleen weight of NOG ( $n = 6$ ) and BALB/c<sup>nu</sup> ( $n = 6$ ) mice at 168 h after tracer administration expressed as median weight with IQR. **(K)** Pooled data of [ $^{89}\text{Zr}$ ]Zr-N-suc-Df-ERY974 uptake in

spleen, femur, cortical femur, femur bone marrow of NOG ( $n = 18$ ) and BALB/c<sup>nu</sup> ( $n = 6$ ) mice at 168 h after administration expressed as median %ID/g with IQR.

**Fig. S5. Dose escalation of [<sup>89</sup>Zr]Zr-N-suc-Df-ERY974 in immunodeficient NOG mice bearing different tumor xenografts.** (A) *Ex vivo* biodistribution of [<sup>89</sup>Zr]Zr-N-suc-Df-ERY974 in HepG2 at 168 h post injection with 10 µg ( $n = 12$ ), 2000 µg ( $n = 6$ ), or 1000 µg GPC3 bivalent ( $n = 3$ ), and in TOV-21G with 10 µg ( $n = 6$ ) or 2000 µg ( $n = 2$ ). Doses higher than 10 µg were supplemented with non-labeled ERY974 or GPC3 bivalent antibody. Data is expressed as median %ID/g with interquartile range (IQR). \*\*  $P \leq 0.01$  (Mann-Whitney U). (B) Uptake of [<sup>89</sup>Zr]Zr-N-suc-Df-ERY974 dose groups in blood expressed as median %ID/g with IQR. \* $P \leq 0.05$  (Mann-Whitney U). (C) Tumor-to-blood ratio of [<sup>89</sup>Zr]Zr-N-suc-Df-ERY974 dose groups expressed as median with IQR. \* $P \leq 0.05$ ; \*\*  $P \leq 0.01$  (Mann-Whitney U). (D) Uptake of [<sup>89</sup>Zr]Zr-N-suc-Df-ERY974 dose groups in liver expressed as median %ID/g with IQR. \* $P \leq 0.05$  (Mann-Whitney U).

**Fig. S6. *Ex vivo* biodistribution of different tracers in different mice models at 168 h after tracer administration.** (A) Biodistribution of 10 µg [<sup>89</sup>Zr]Zr-N-suc-Df-ERY974 in NOG ( $n = 12$ ) and huNOG ( $n = 5$ ) mice expressed as median % injected dose per gram of tissue (% ID/g) with interquartile range (IQR). (B) Biodistribution of 10 µg [<sup>89</sup>Zr]Zr-N-suc-Df-KLH/CD3 in NOG ( $n = 5$ ), huNOG ( $n = 4$ ), or huNOG mice co-injected with 10 µg ERY974 ( $n = 3$ ) expressed as median % ID/g with IQR. (C) Biodistribution of 10 µg [<sup>89</sup>Zr]Zr-N-suc-Df-KLH/KLH in NOG ( $n = 6$ ), huNOG ( $n = 6$ ), or huNOG mice co-injected with 10 µg ERY974 ( $n = 3$ ) expressed as median % ID/g with IQR.

**Fig. S7. Binding to peripheral blood mononuclear sites of huNOG mice injected with [<sup>89</sup>Zr]Zr-N-suc-Df-ERY974, [<sup>89</sup>Zr]Zr-N-suc-Df-KLH/CD3 or [<sup>89</sup>Zr]Zr-N-suc-Df-KLH/KLH.** Percentage of bound tracer to peripheral blood mononuclear cells (PBMCs) isolated from blood from huNOG mice injected with [<sup>89</sup>Zr]Zr-N-suc-Df-ERY974 (*n* = 3), [<sup>89</sup>Zr]Zr-N-suc-Df-KLH/CD3 (*n* = 4) or [<sup>89</sup>Zr]Zr-N-suc-Df-KLH/KLH (*n* = 4).

**Fig. S8. CD3 immunohistochemistry in HepG2 tumors of huNOG mice injected with [<sup>89</sup>Zr]Zr-N-suc-Df-ERY974, [<sup>89</sup>Zr]Zr-N-suc-Df-KLH/CD3 or [<sup>89</sup>Zr]Zr-N-suc-Df-KLH/KLH.** (A) Intratumoral (top panel; scale bar length represents 100 μm) and stromal (bottom panel; scale bar length represents 100 μm) CD3+ T cells in HepG2 tumors (middle panel; scale bar length represents 5 mm) of huNOG mice injected with [<sup>89</sup>Zr]Zr-N-suc-Df-ERY974, [<sup>89</sup>Zr]Zr-N-suc-Df-KLH/CD3 or [<sup>89</sup>Zr]Zr-N-suc-Df-KLH/KLH. (B) Quantification of T cell infiltrations expressed as CD3+ cells/mm<sup>2</sup>. Lines represent median with interquartile range. \**P* < 0.05.

**Fig. S9. CD3 immunohistochemistry in HepG2 tumors of huNOG mice co-injected with ERY974.** (A) Intratumoral CD3+ T cells in HepG2 tumors of huNOG mice injected with [<sup>89</sup>Zr]Zr-N-suc-Df-KLH/CD3 or [<sup>89</sup>Zr]Zr-N-suc-Df-KLH/KLH co-injected with ERY974. Scale bar length represents 100 μm. (B) Quantification of CD3+ T cells expressed as CD3+ cells/mm<sup>2</sup>.

**Fig. S10. Immunohistochemical staining validation.** (A) Glypican 3 (GPC3) or isotype control staining on human placenta tissue or huNOG HepG2 tumors. Scale bar length represents

100  $\mu\text{m}$  for placenta and 2.5 mm for HepG2 tumor. **(B)** CD3 or isotype control staining on human liver or huNOG HepG2 tumors. Scale bar length represents 50  $\mu\text{m}$  for liver and 500  $\mu\text{m}$  for HepG2 tumor.

## References

1. Warnders FJ, Waaijer SJ, Pool M, Lub-de Hooge MN, Friedrich M, Terwisscha van Scheltinga AG, et al. Biodistribution and PET imaging of labeled bispecific T cell-engaging antibody targeting EpCAM. *J Nucl Med*. 2016;57(5):812-7.
2. Verel I, Visser GW, Boellaard R, Stigter-van Walsum M, Snow GB, van Dongen GA.  $^{89}\text{Zr}$  immuno-PET: comprehensive procedures for the production of  $^{89}\text{Zr}$ -labeled monoclonal antibodies. *J Nucl Med*. 2003;44(8):1271-81.
3. Bankhead P, Loughrey MB, Fernandez JA, Dombrowski Y, McArt DG, Dunne PD, et al. QuPath: open source software for digital pathology image analysis. *Sci Rep*. 2017;7(1):16878.
