# Supplementary figures and images for: Preclinical PET imaging of bispecific antibody ERY974 targeting CD3 and glypican 3 reveals that tumor uptake correlates to T cell infiltrate
Source: PubMed Central journal article supplement — J Immunother Cancer. 2020 Mar 26;8(1):e000548. doi: 10.1136/jitc-2020-000548 (PMC7206965; doi:10.1136/jitc-2020-000548), 2020-03-26

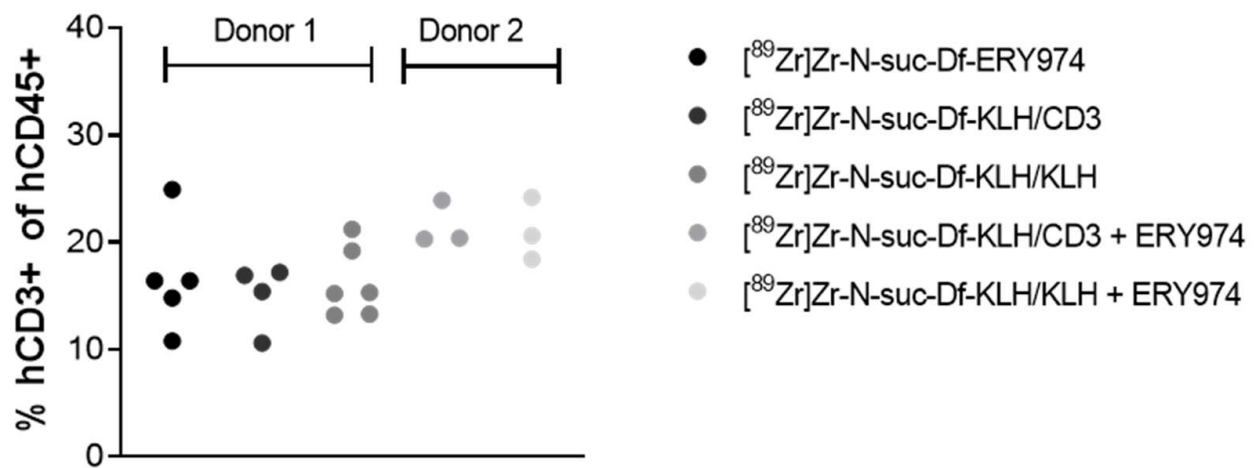

Supplement: jitc-2020-000548supp002.pdf [file jitc-2020-000548supp002.pdf]

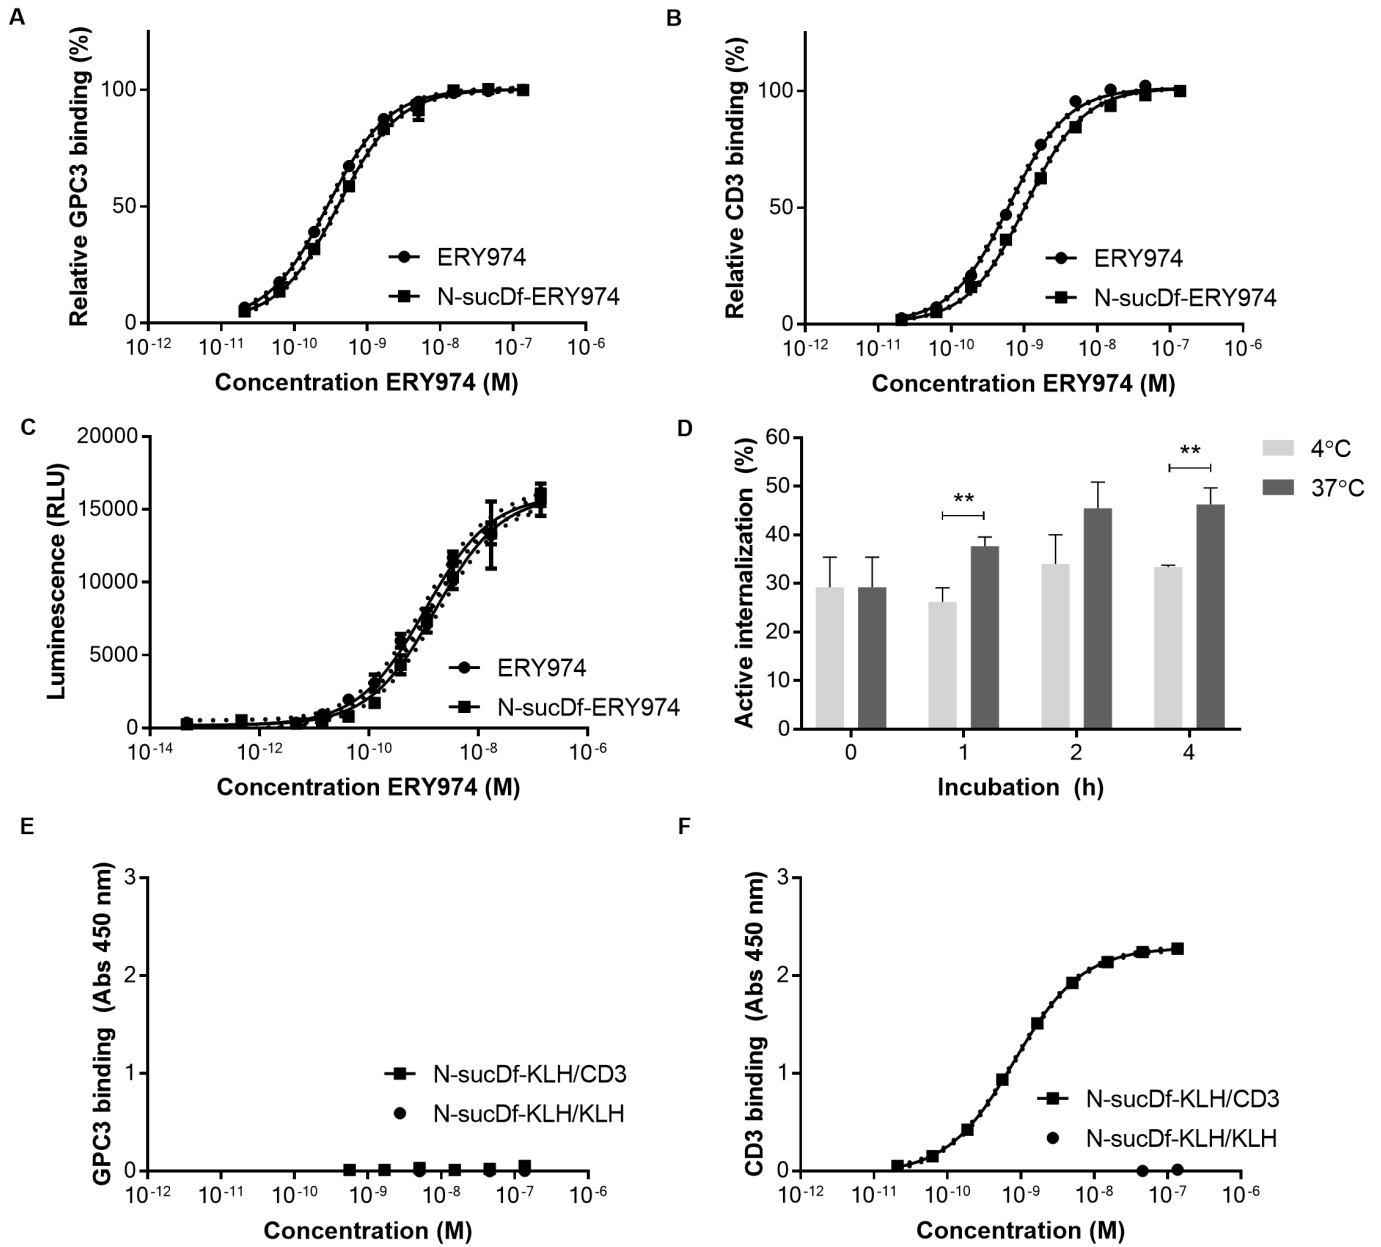

Supplement: jitc-2020-000548supp003.pdf [file jitc-2020-000548supp003.pdf]

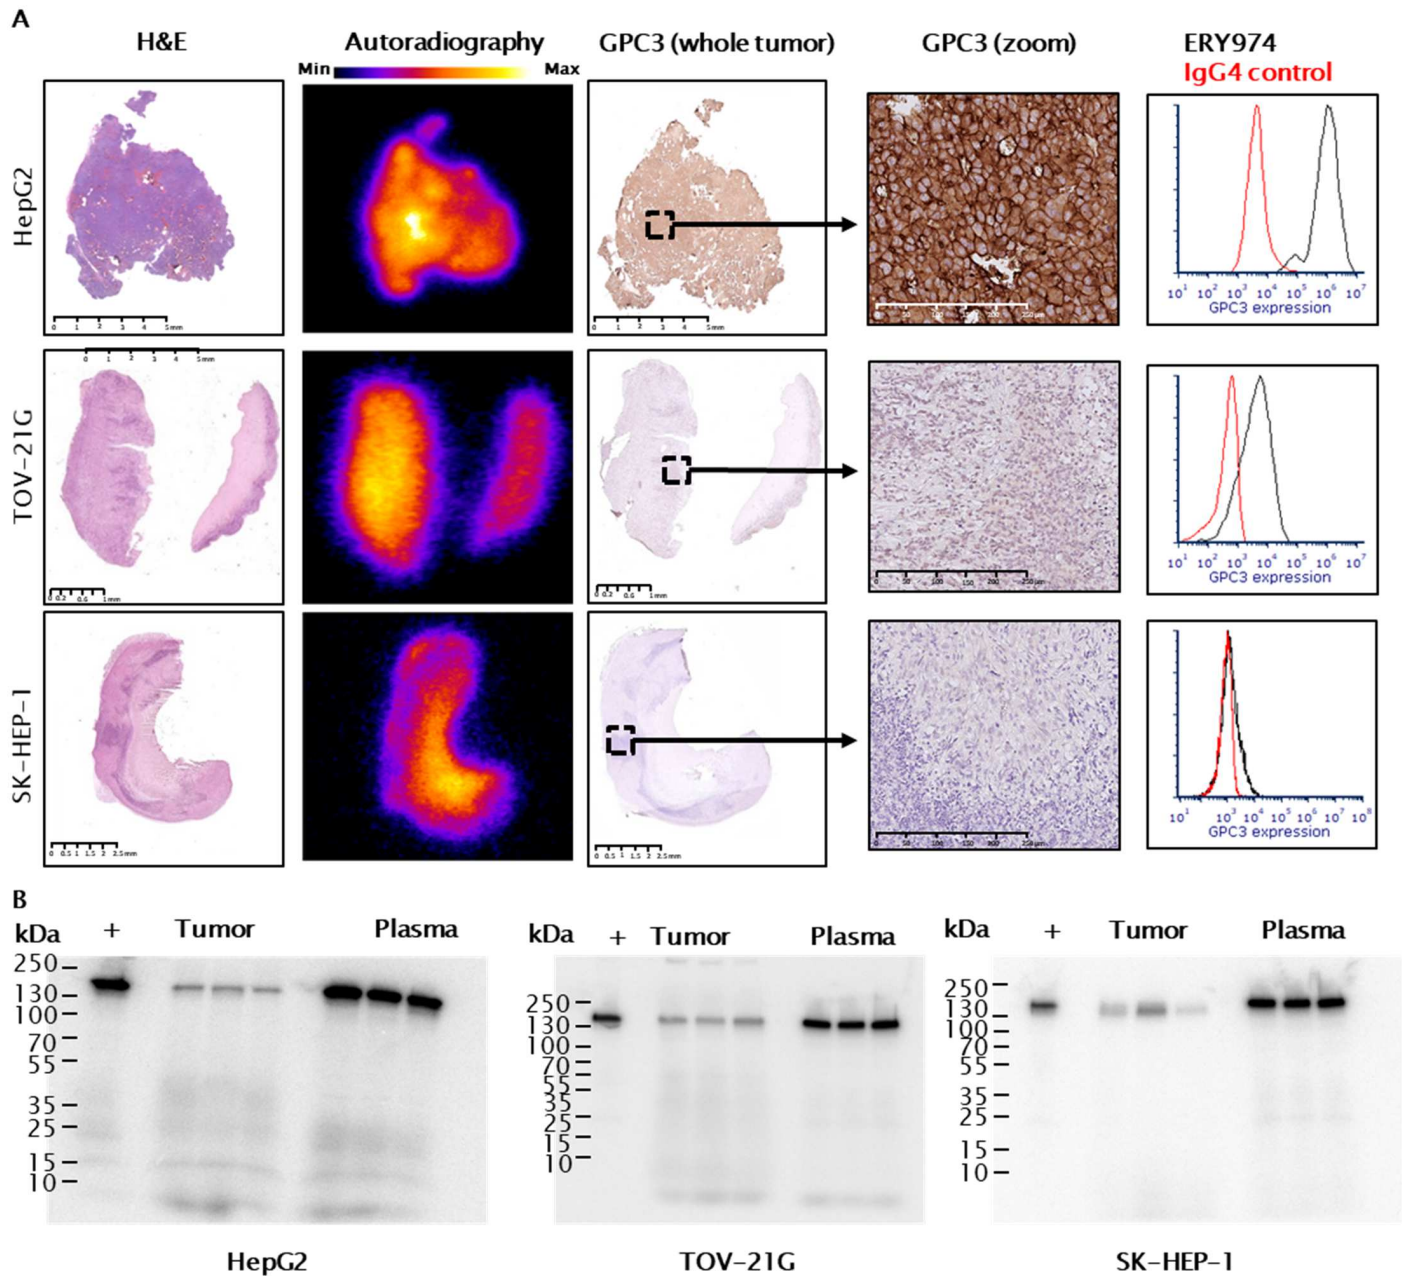

Supplement: jitc-2020-000548supp004.pdf [file jitc-2020-000548supp004.pdf]

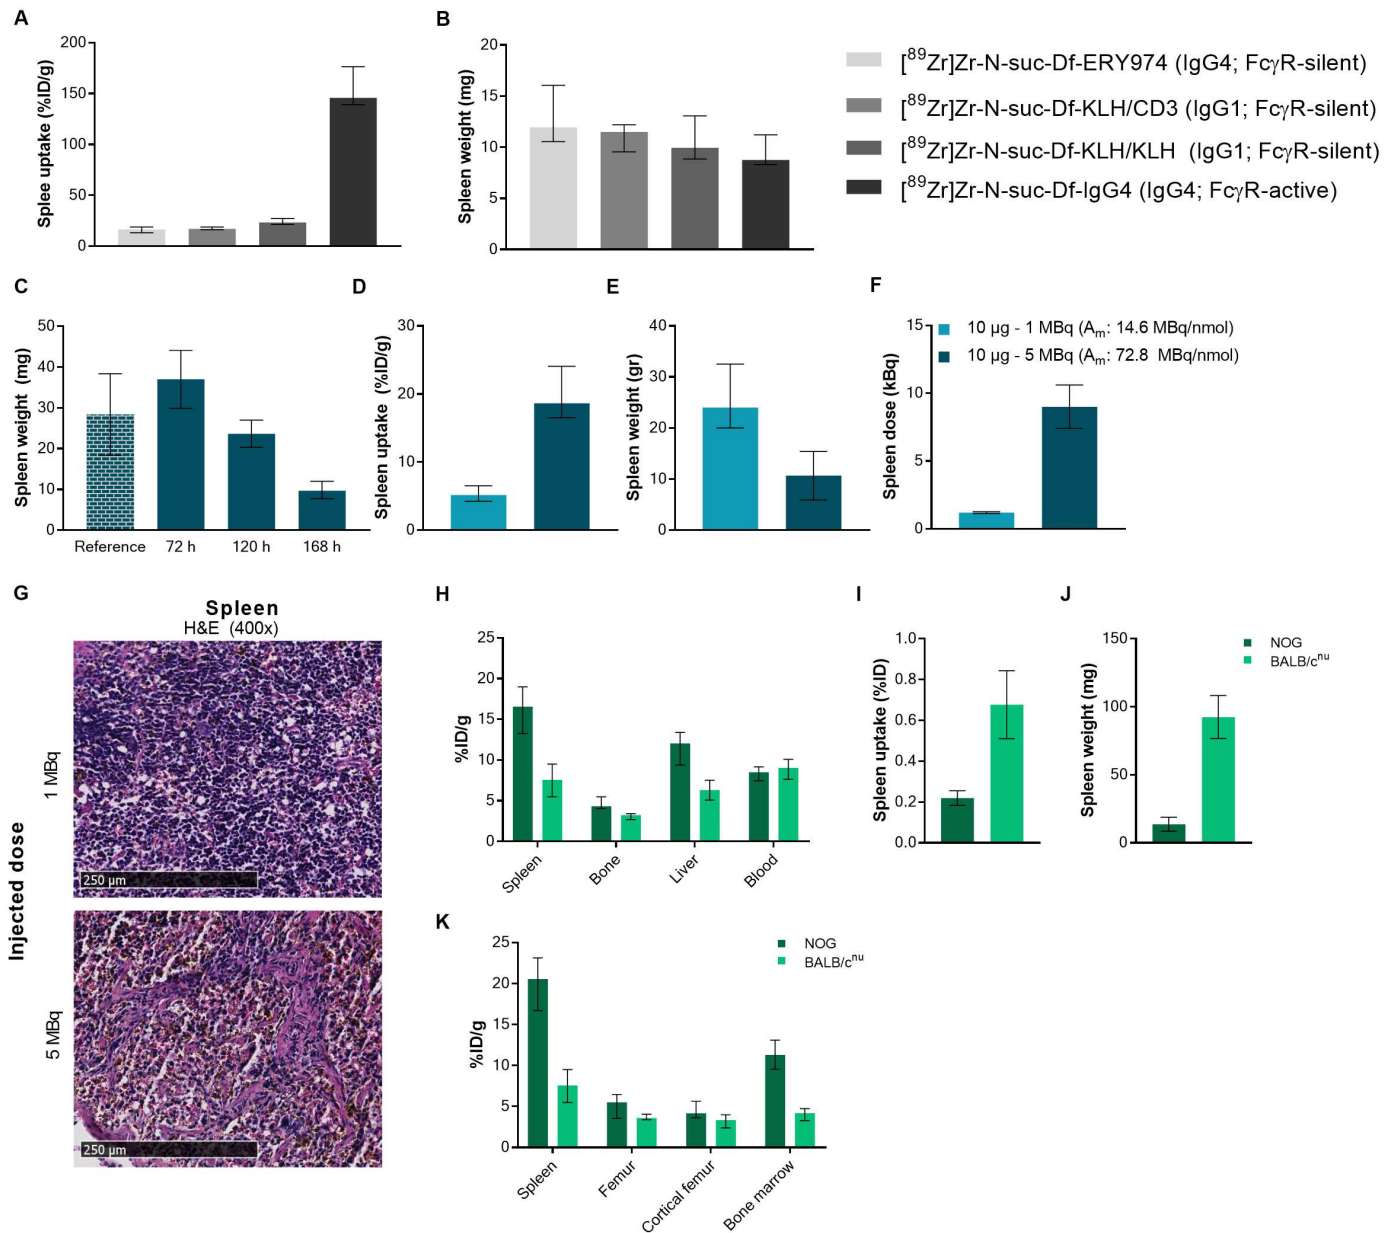

Supplement: jitc-2020-000548supp005.pdf [file jitc-2020-000548supp005.pdf]

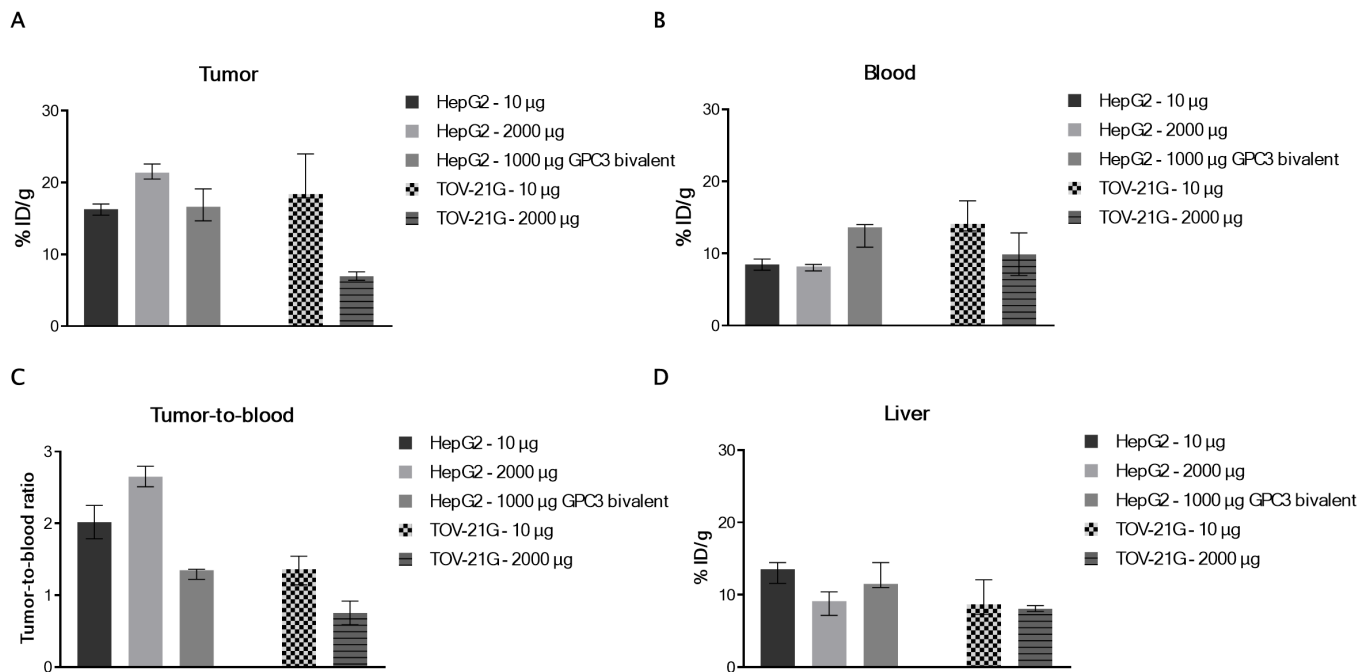

Supplement: jitc-2020-000548supp006.pdf [file jitc-2020-000548supp006.pdf]

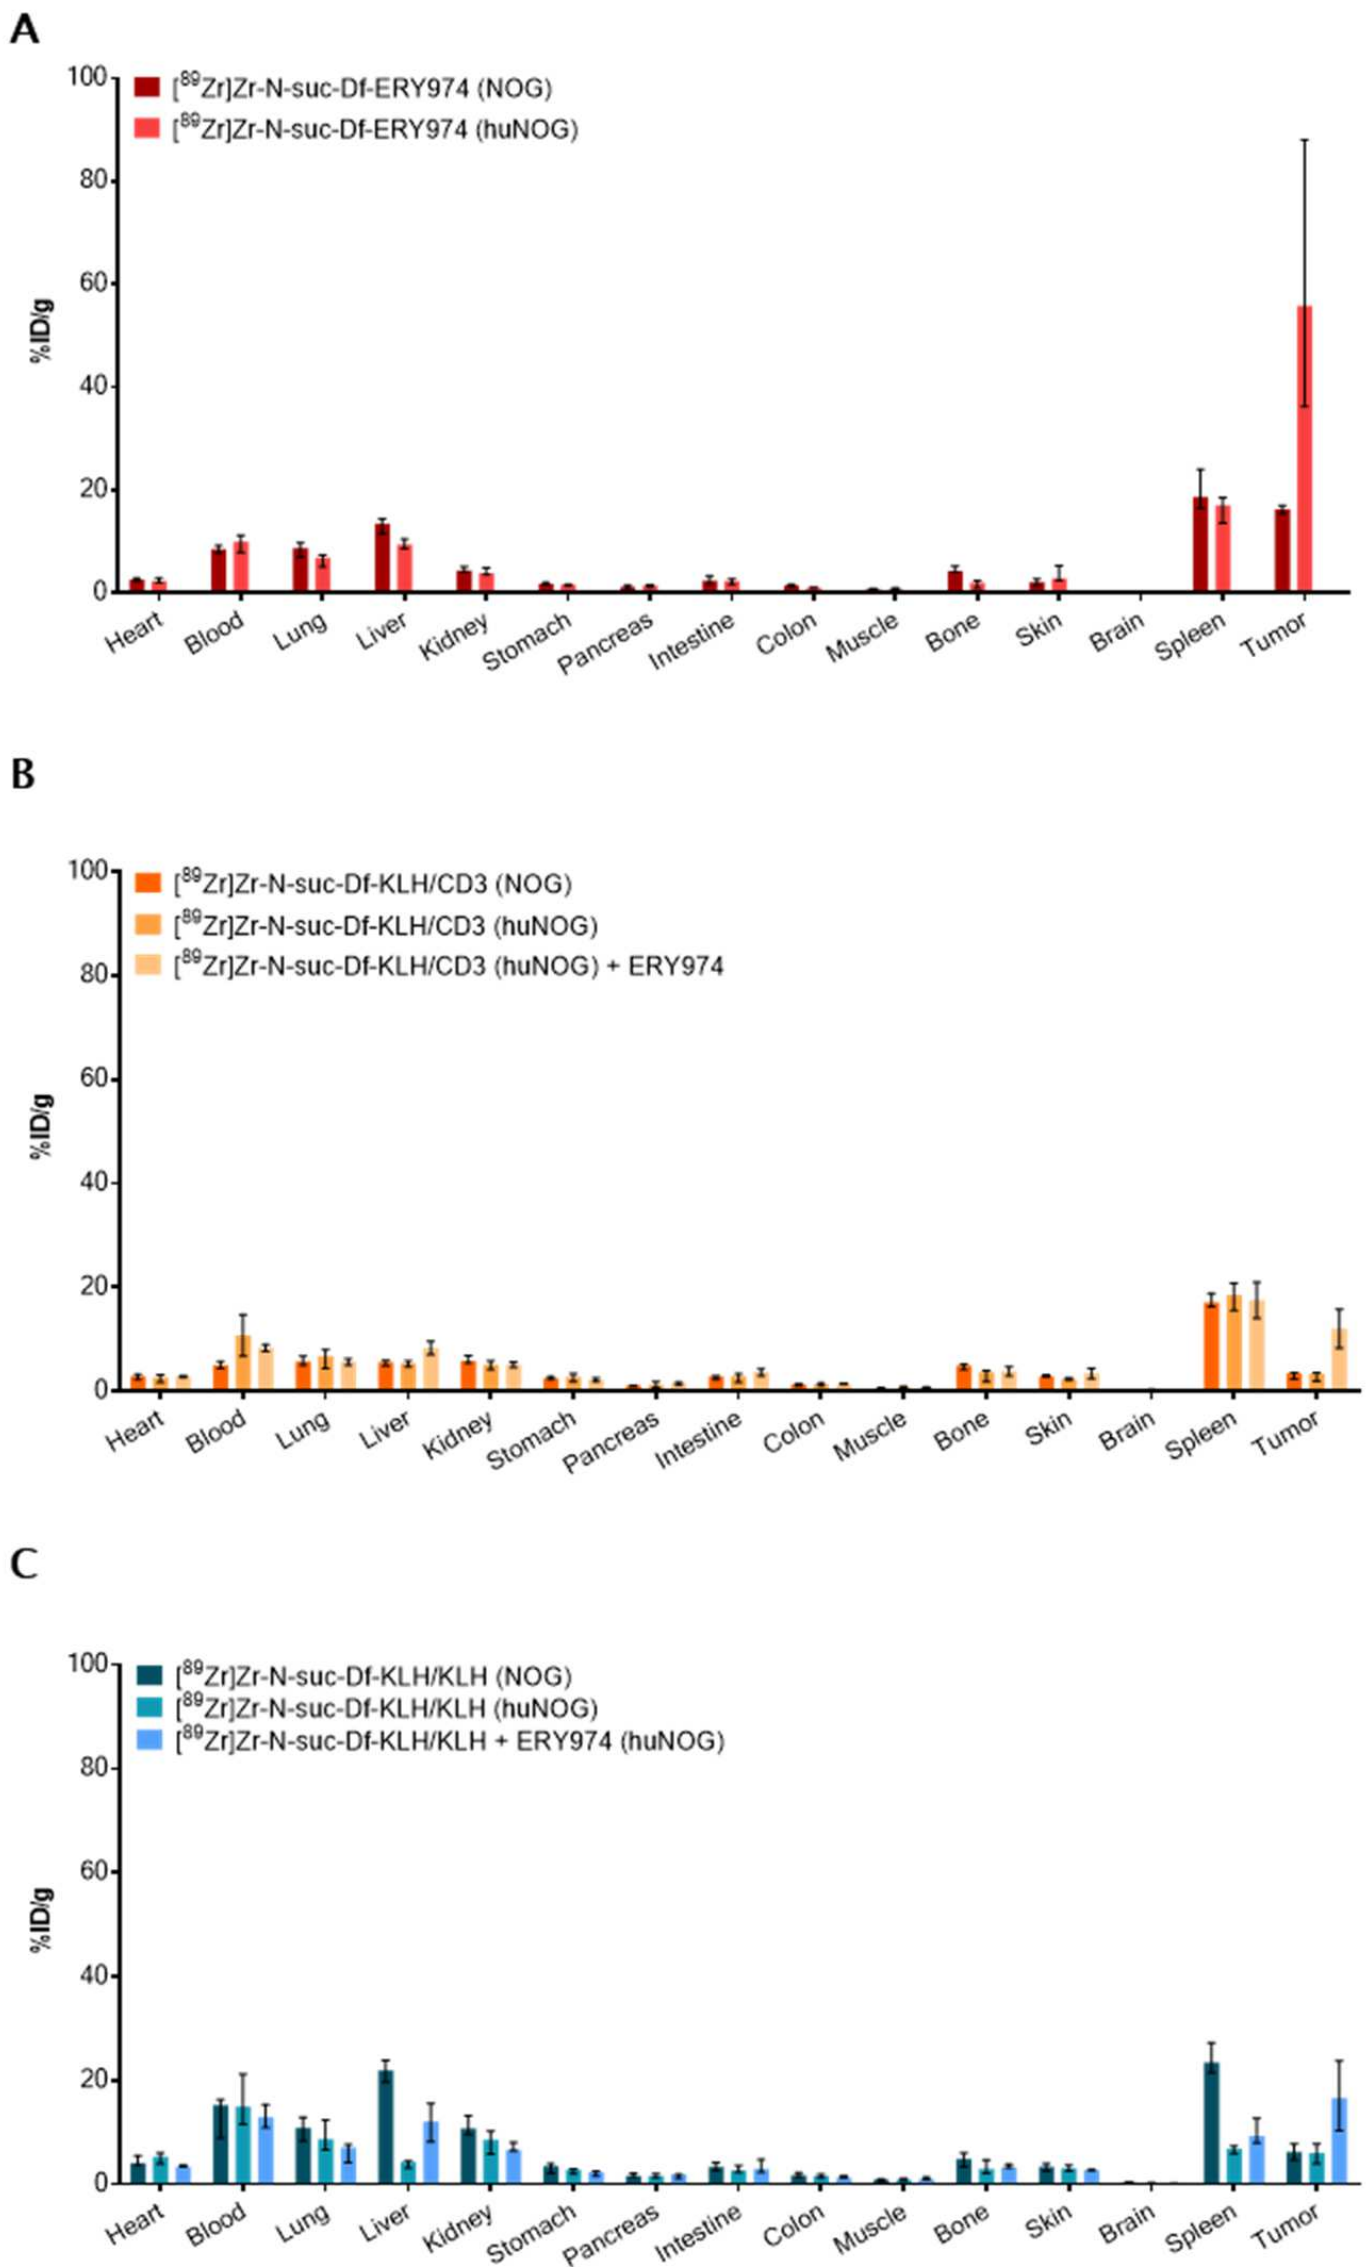

Supplement: jitc-2020-000548supp007.pdf [file jitc-2020-000548supp007.pdf]

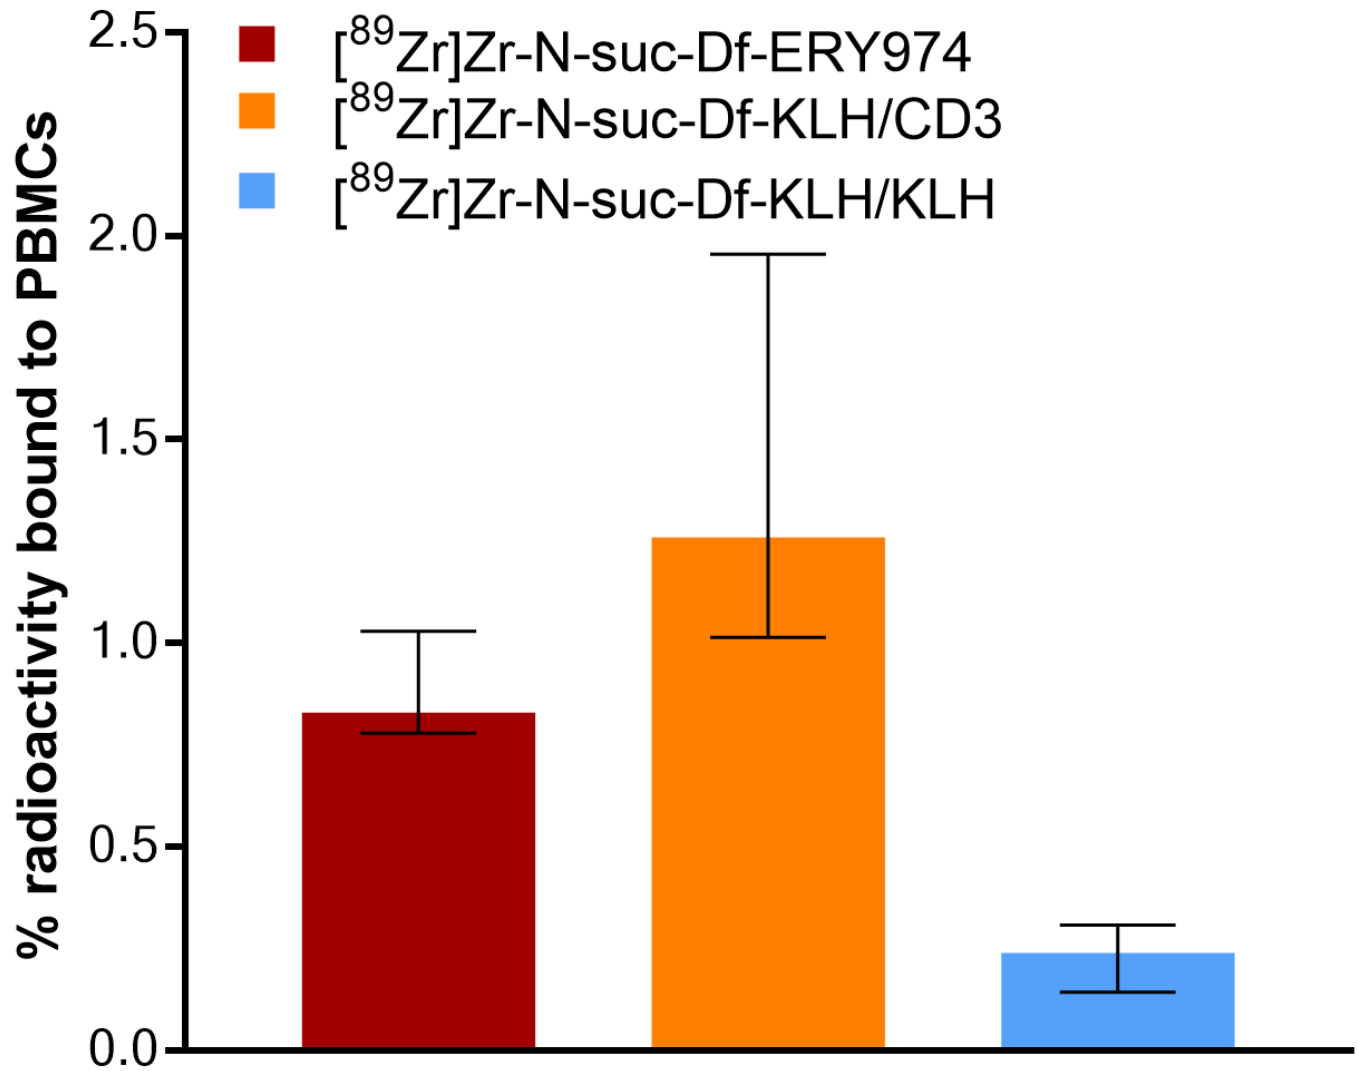

Supplement: jitc-2020-000548supp008.pdf [file jitc-2020-000548supp008.pdf]

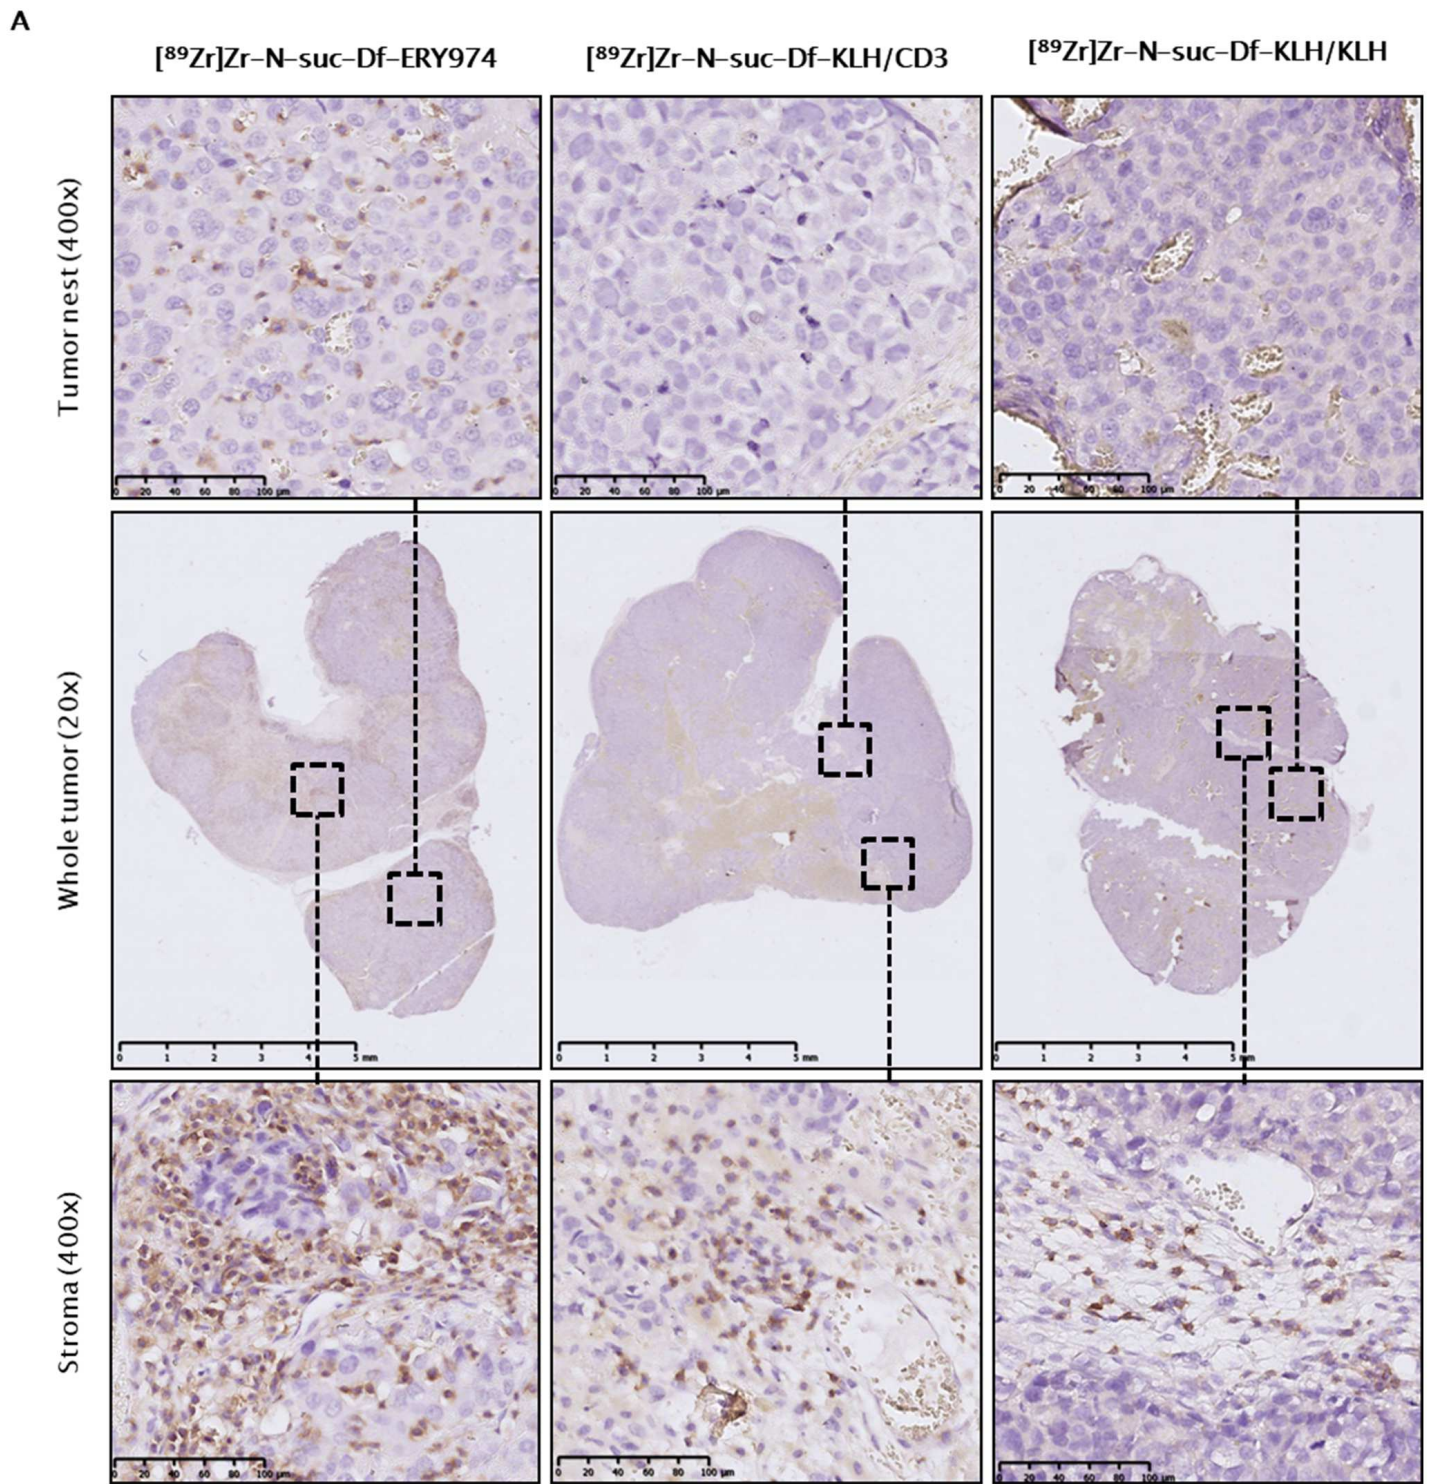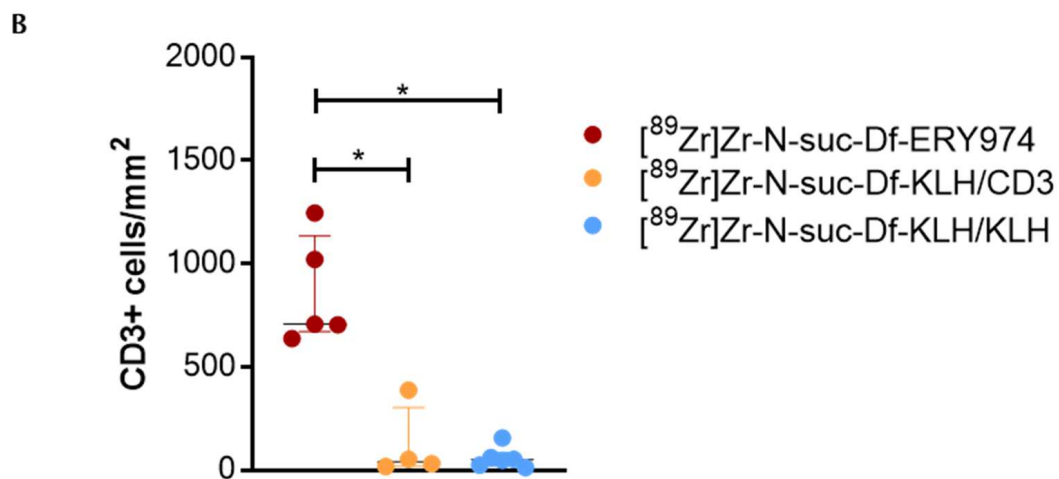

Supplement: jitc-2020-000548supp009.pdf [file jitc-2020-000548supp009.pdf]

A  $[^{89}\text{Zr}]\text{Zr-N-suc-Df-KLH/CD3} + \text{ERY974}$  $[^{89}\text{Zr}]\text{Zr-N-suc-Df-KLH/KLH} + \text{ERY974}$ 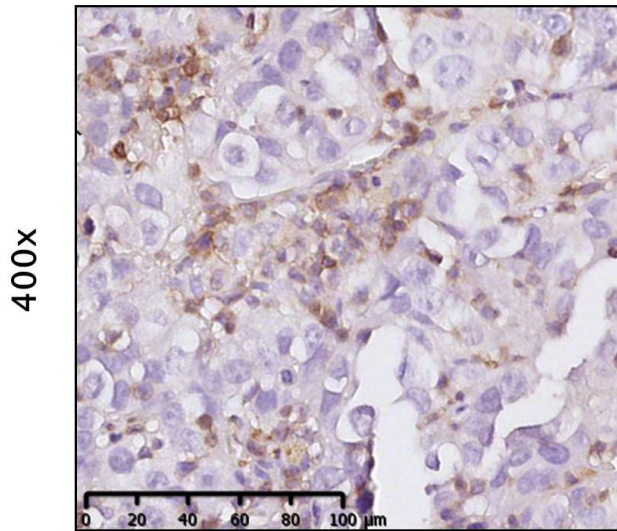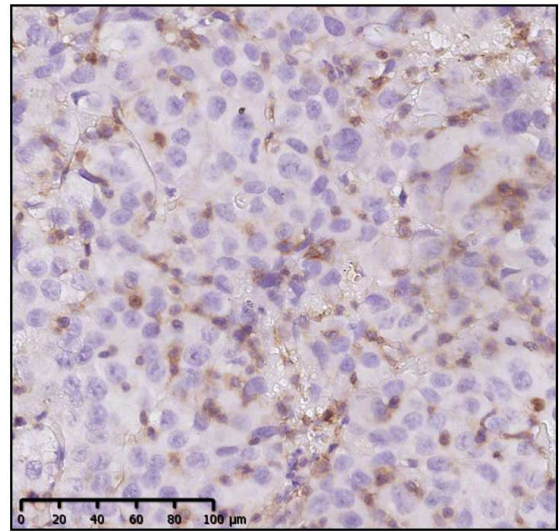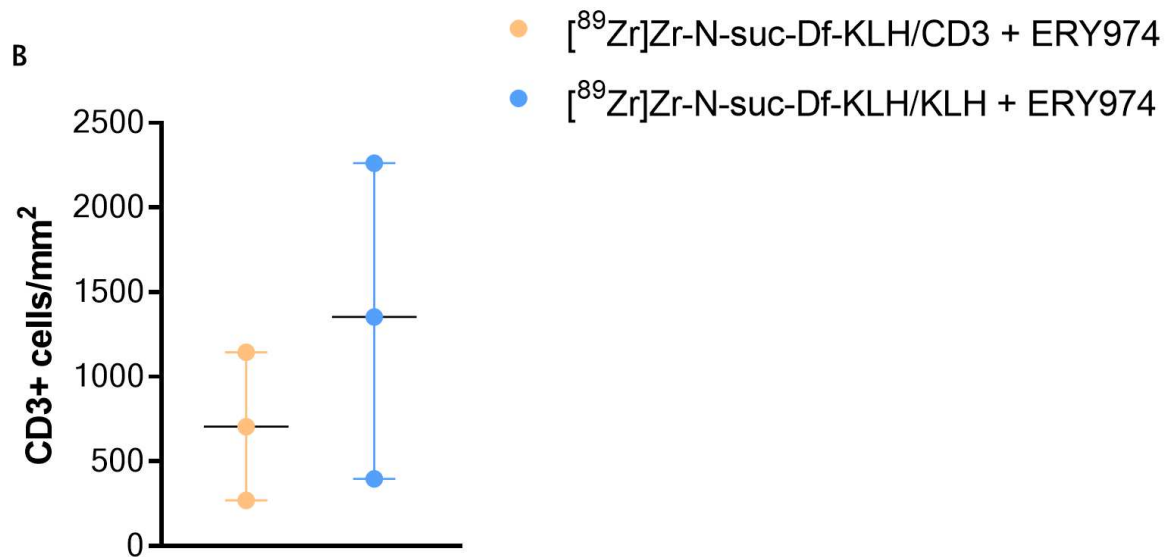

Supplement: jitc-2020-000548supp010.pdf [file jitc-2020-000548supp010.pdf]

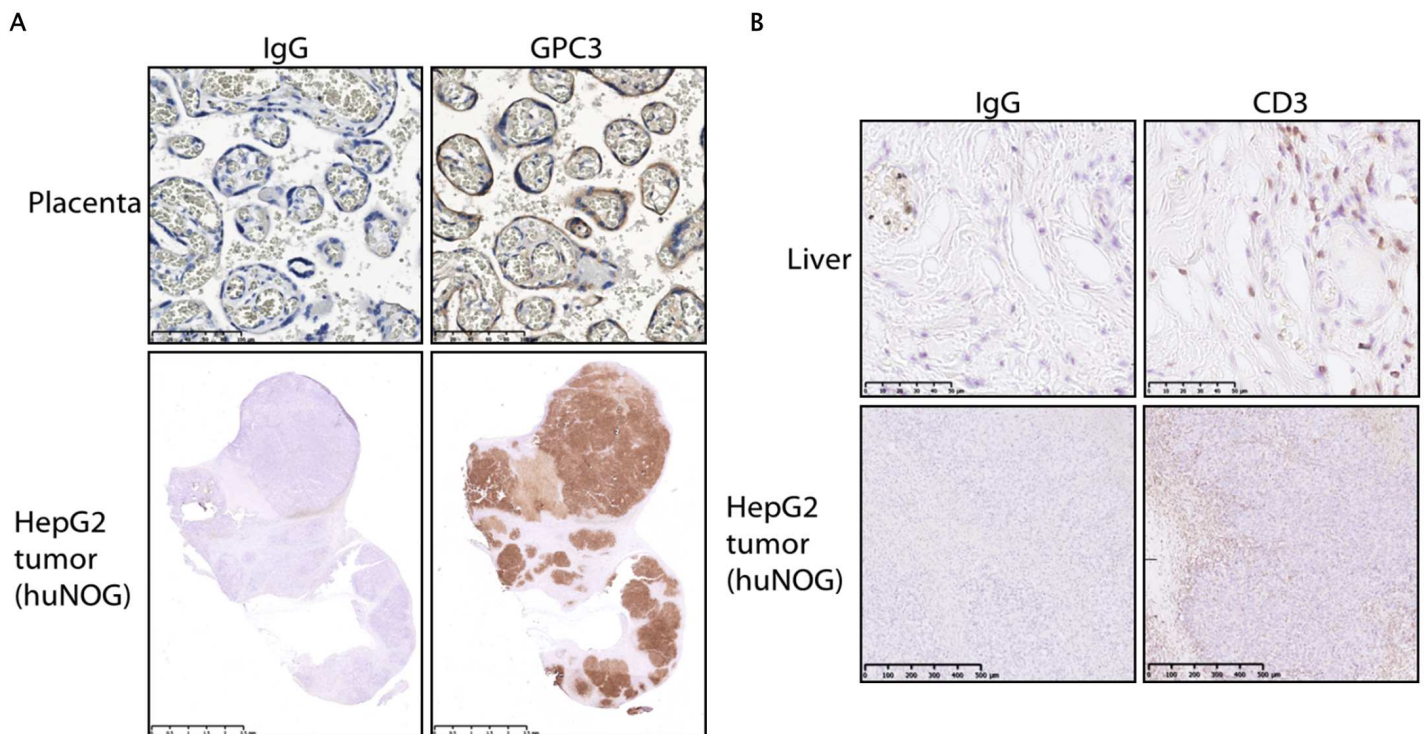

Supplement: jitc-2020-000548supp011.pdf [file jitc-2020-000548supp011.pdf]
